# Supplementary material for: The influence of dopant concentration on temperature dependent emission spectra in LiLa1−x−yEuxTbyP4O12 nanocrystals: toward rational design of highly-sensitive luminescent nanothermometers
Source: Royal Society of Chemistry journal article supplement (doi:10.1039/c6cp00898d), 2016-01-01
Supplement: c6cp00898d1.pdf [file c6cp00898d1.pdf]

Supporting Information

**The influence of the dopant concentration on temperature dependent emission spectra in  $\text{LiLa}_{1-x-y}\text{Eu}_x\text{Tb}_y\text{P}_4\text{O}_{12}$  nanocrystals: toward rational designing of highly-sensitive luminescent nanothermometer**

**L. Marciniak\* and A. Bednarkiewicz**

<sup>1</sup>Institute of Low Temperature and Structure Research, Polish Academy of Sciences, Okólna 2, 50-422 Wrocław, Poland

\* corresponding author: [l.marciniak@int.pan.wroc.pl](mailto:l.marciniak@int.pan.wroc.pl)

**KEYWORDS:** luminescent thermometer, nanocrystals,  $\text{Tb}^{3+}$ ,  $\text{Eu}^{3+}$ , cross-relaxation, energy transfer

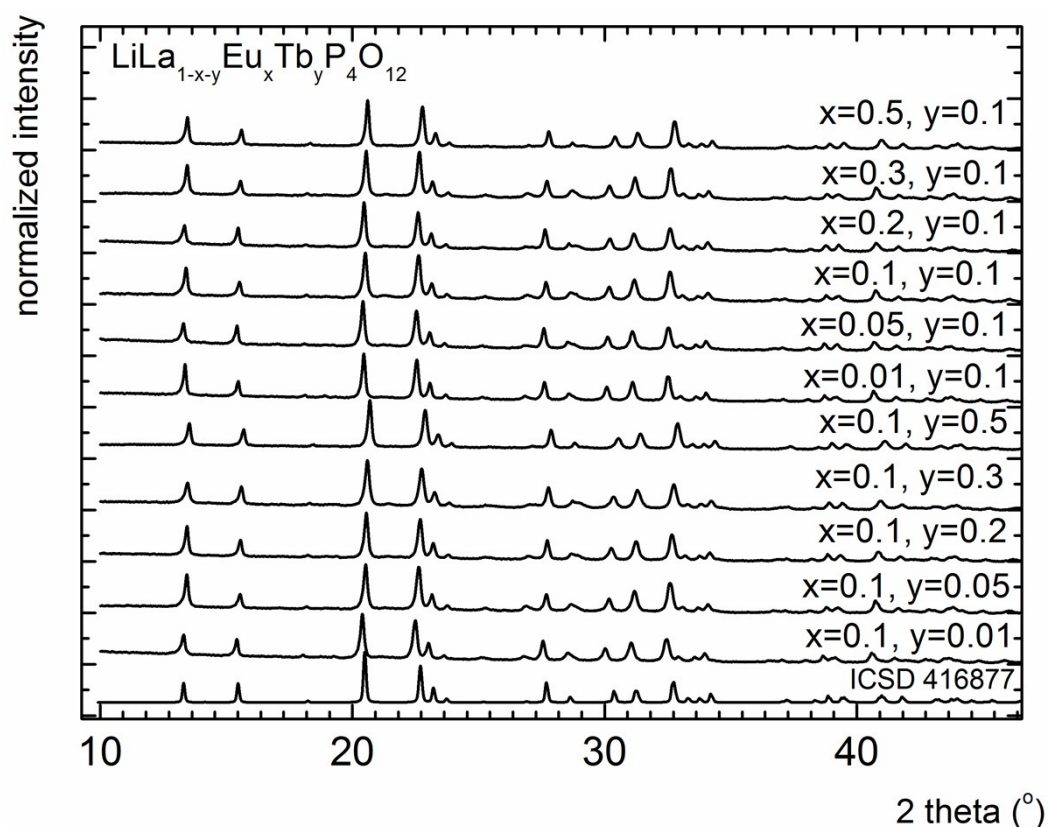

Figure S1. X-ray diffraction data for  $\text{LiLa}_{1-x-y}\text{Eu}_x\text{Tb}_y\text{P}_4\text{O}_{12}$  nanocrystals

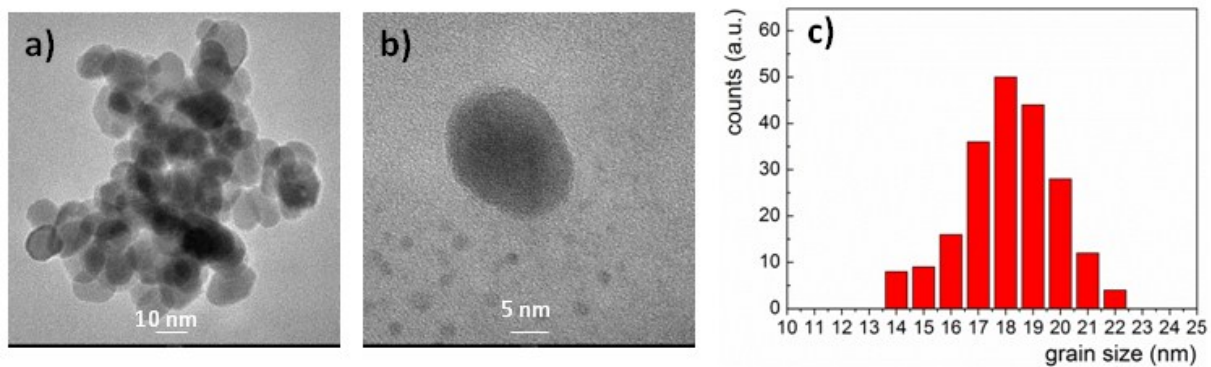

Figure S2. TEM images of  $\text{LiLa}_{0.5}\text{Eu}_{0.1}\text{Tb}_{0.4}\text{P}_4\text{O}_{12}$  nanocrystals –a and b with grain size distribution –c.

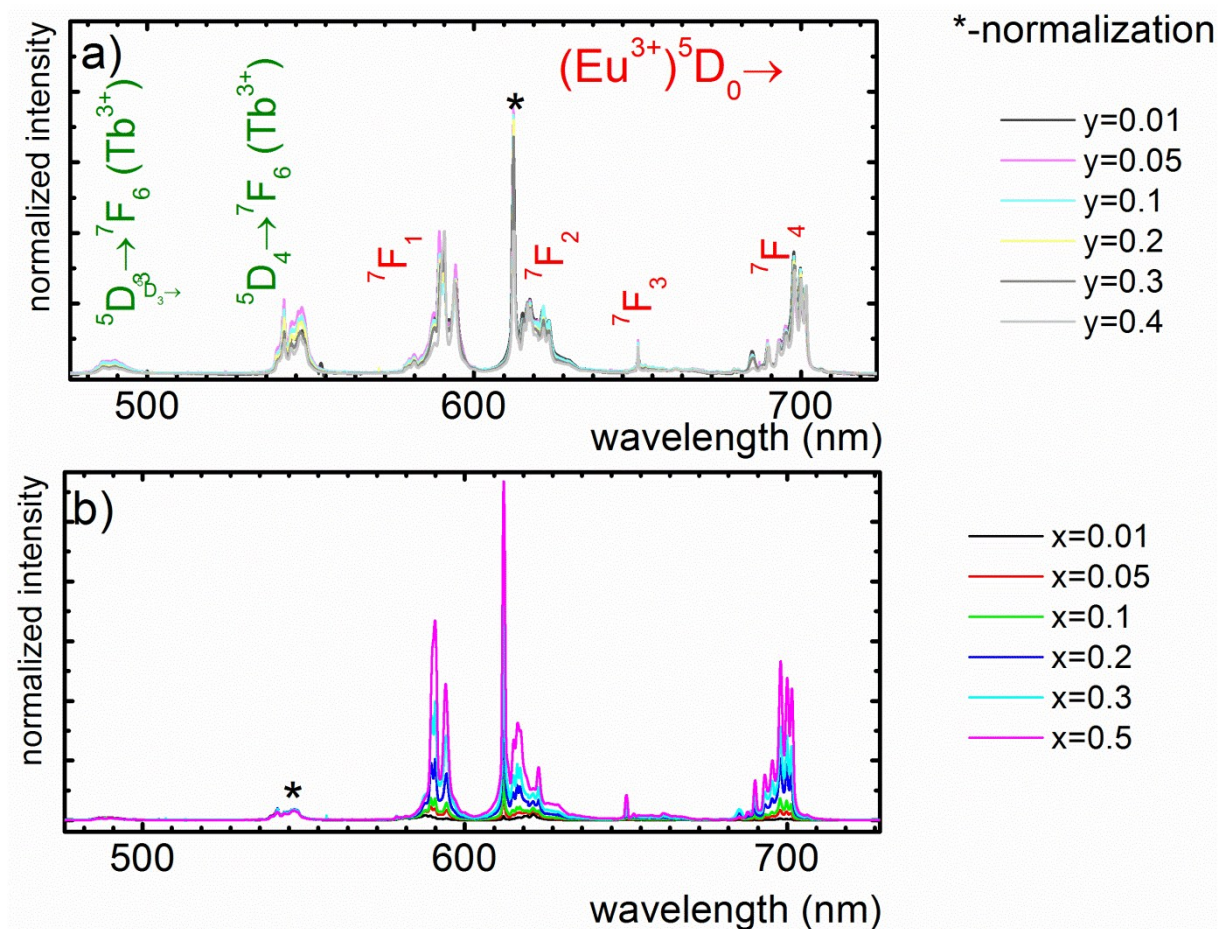

Figure S3. The comparison of emission spectra of  $\text{LiLa}_{1-x-y}\text{Eu}_x\text{Tb}_y\text{P}_4\text{O}_{12}$  for constant  $x=0.1$  concentration of  $\text{Eu}^{3+}$  ions-a; and for constant  $x=0.1$  concentration of  $\text{Tb}^{3+}$  ions-b.

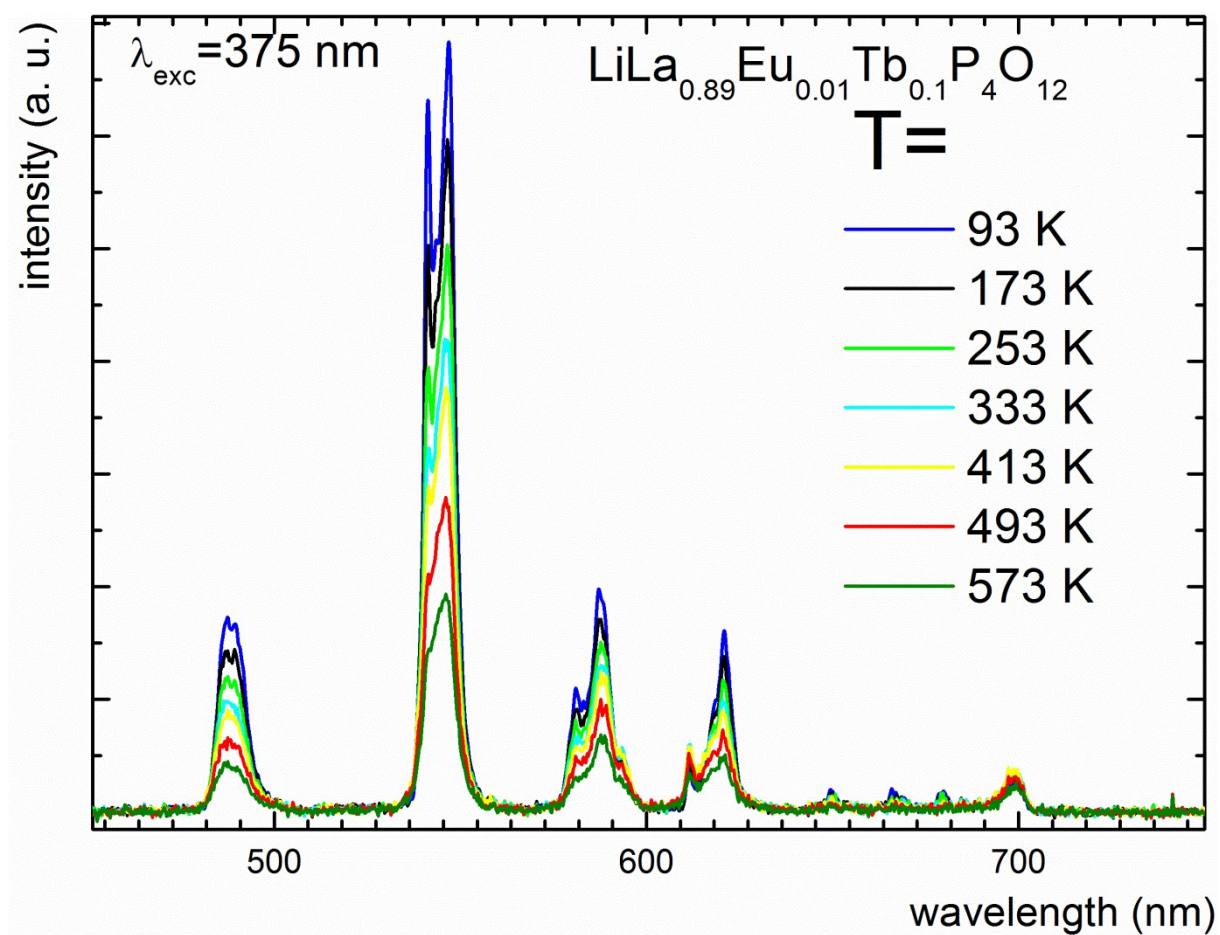

Figure S4. Emission spectra of  $\text{LiLa}_{0.89}\text{Eu}_{0.01}\text{Tb}_{0.1}\text{P}_4\text{O}_{12}$  nanocrystals measured at different temperatures.

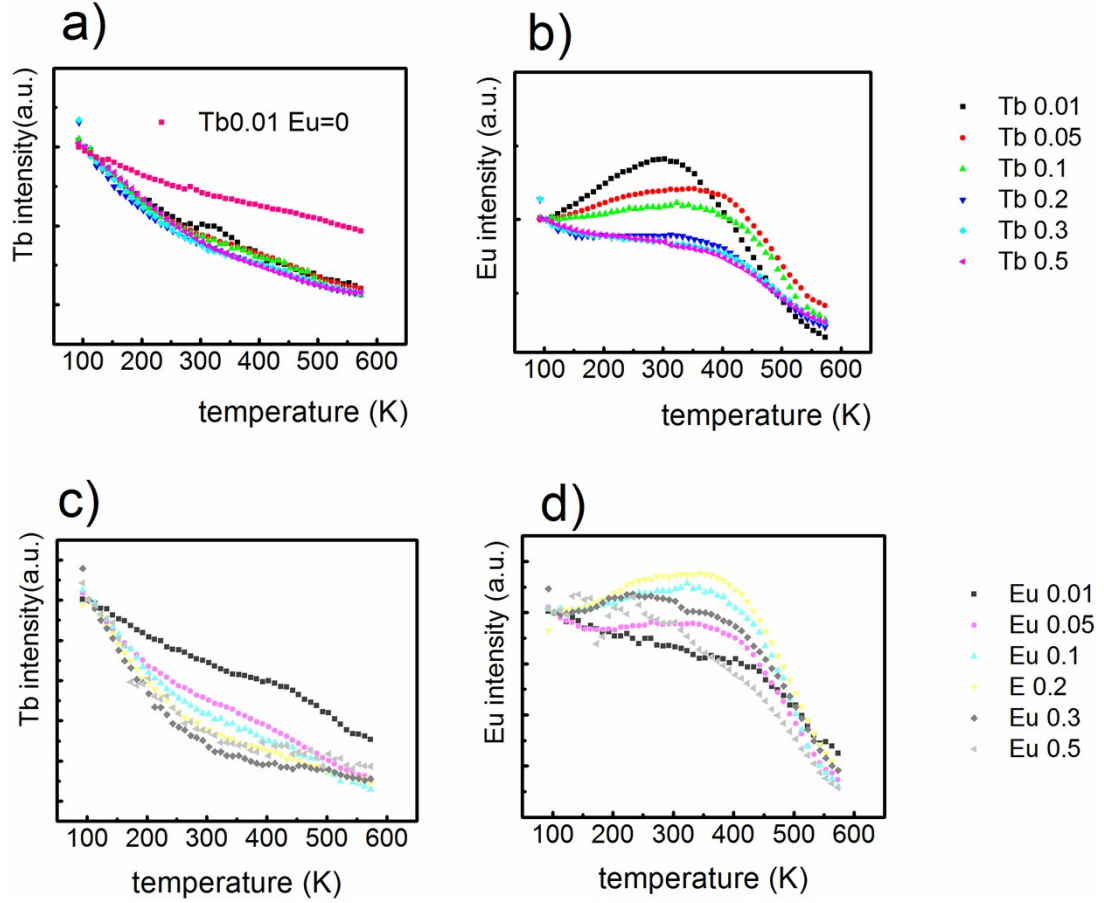

Figure S5. Temperature evolution of Tb<sup>3+</sup> (a) and Eu<sup>3+</sup> (b) emission intensities in LiLa<sub>1-x-y</sub>Eu<sub>x</sub>Tb<sub>y</sub>P<sub>4</sub>O<sub>12</sub> nanocrystals for samples doped with constant x=0.1 Eu<sup>3+</sup> ions concentration and different Tb<sup>3+</sup> concentration; temperature evolution of Tb<sup>3+</sup> (c) and Eu<sup>3+</sup> (d) emission intensities respectively for samples doped with constant x=0.1 Tb<sup>3+</sup> ions concentration and different Eu<sup>3+</sup> concentration.

Energy transfer which can take place between Eu<sup>3+</sup> and Tb<sup>3+</sup> ions can be described by following rate equations:

$$\frac{dn_0}{dt} = -\Phi n_0 + n_3 W_{30} + n_4 W_{40} + n_8 n_1 W^{10} - n_4 n_0 W^{CR4} \quad (S1)$$

$$\frac{dn_1}{dt} = n_3 W_{31} + n_4 W_{41} - n_8 n_1 W^{10} - n_1 W^{1NR} \quad (S2)$$

$$\frac{dn_2}{dt} = n_3 W_{32} + n_4 W_{42} + n_4 n_0 W^{CR4} - n_2 W^{2NR} \quad (S3)$$

$$\frac{dn_3}{dt} = -n_3 W_3 - W^{ET38} n_3 + n_4 n_0 W^{CR4} + n_4 n_5 W^{CR5} + W^{BET}_{83} n_8 - W^{3NR} n_3 + W^{4NR} n_4 \quad (S4)$$

$$\frac{dn_4}{dt} = \Phi n_0 - n_4 W_4 - n_4 n_0 W^{CR4} - n_4 n_5 W^5 - n_4 W^{4NR} \quad (S5)$$

$$\frac{dn_5}{dt} = n_7 W_{71} - n_5 n_4 W^5 + n_6 n_8 W^{11} \quad (S6)$$

$$\frac{dn_6}{dt} = -n_6 n_8 W^{11} + n_7 W^{7NR} + W_{86} n_8 - W^{NR6} n_6 \quad (S7)$$

$$\frac{dn_7}{dt} = -W^{7NR} n_7 + n_5 n_4 W^5 + W^{87} n_8 + W^{7NR} n_7 \quad (S8)$$

$$\frac{dn_8}{dt} = -n_8 W_8 - n_8 n_6 W^{11} - n_8 n_1 W^{10} + W^{9NR} n_9 - n_8 W^{NR8} \quad (S9)$$

$$\frac{dn_9}{dt} = -W^{NR9} n_9 + W^{10} n_9 n_1 - n_9 W^{BET}_{93} + n_3 W^{ET}_{93} + W^{NR10} n_{10} \quad (S10)$$

$$\sum_i n_i = N \quad (S11)$$

$$\frac{n_i}{N} = N_i \quad (S12)$$

where  $W^{NRi}$  represent the nonradiative decay rate of the  $i^{th}$ -state,  $W_{ij}$  represents the probability of radiative transition between  $i$  and  $j$  states,  $W_{ij}^{ET}$  represents probability of energy transfer between  $i$  and  $j$  state and BET is back ( $Eu^{3+} \rightarrow Tb^{3+}$ ) energy transfer probability.  $W^{CR10}$  represents probability of cross relaxation process represented as process 10 in Fig. 5 and  $n_i$  is the population of  $i^{th}$  state.
